# Supplementary material
Source: Springer Nature journal article supplement (http://www.springermedizin.de/resource/supplementary/12885_2008_1562_MOESM2_ESM.pdf/9472326)

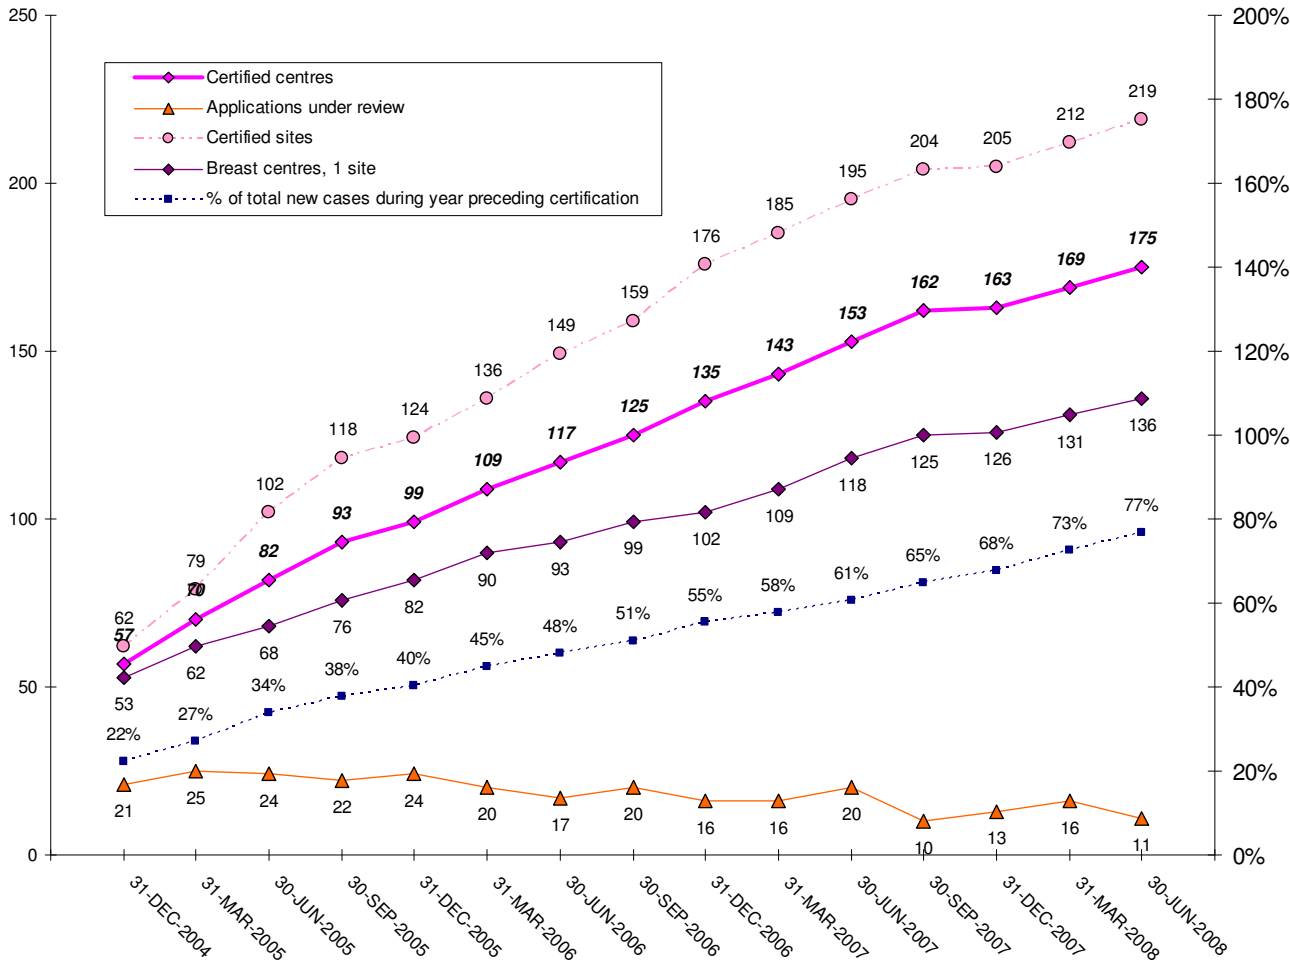

Supplement: MOESM2 [file 9472326]
